# Supplementary material for: Transcriptome analysis of flavonoid biosynthesis in safflower flowers grown under different light intensities
Source: PeerJ journal article supplement (doi:10.7717/peerj.8671), 2020-02-21

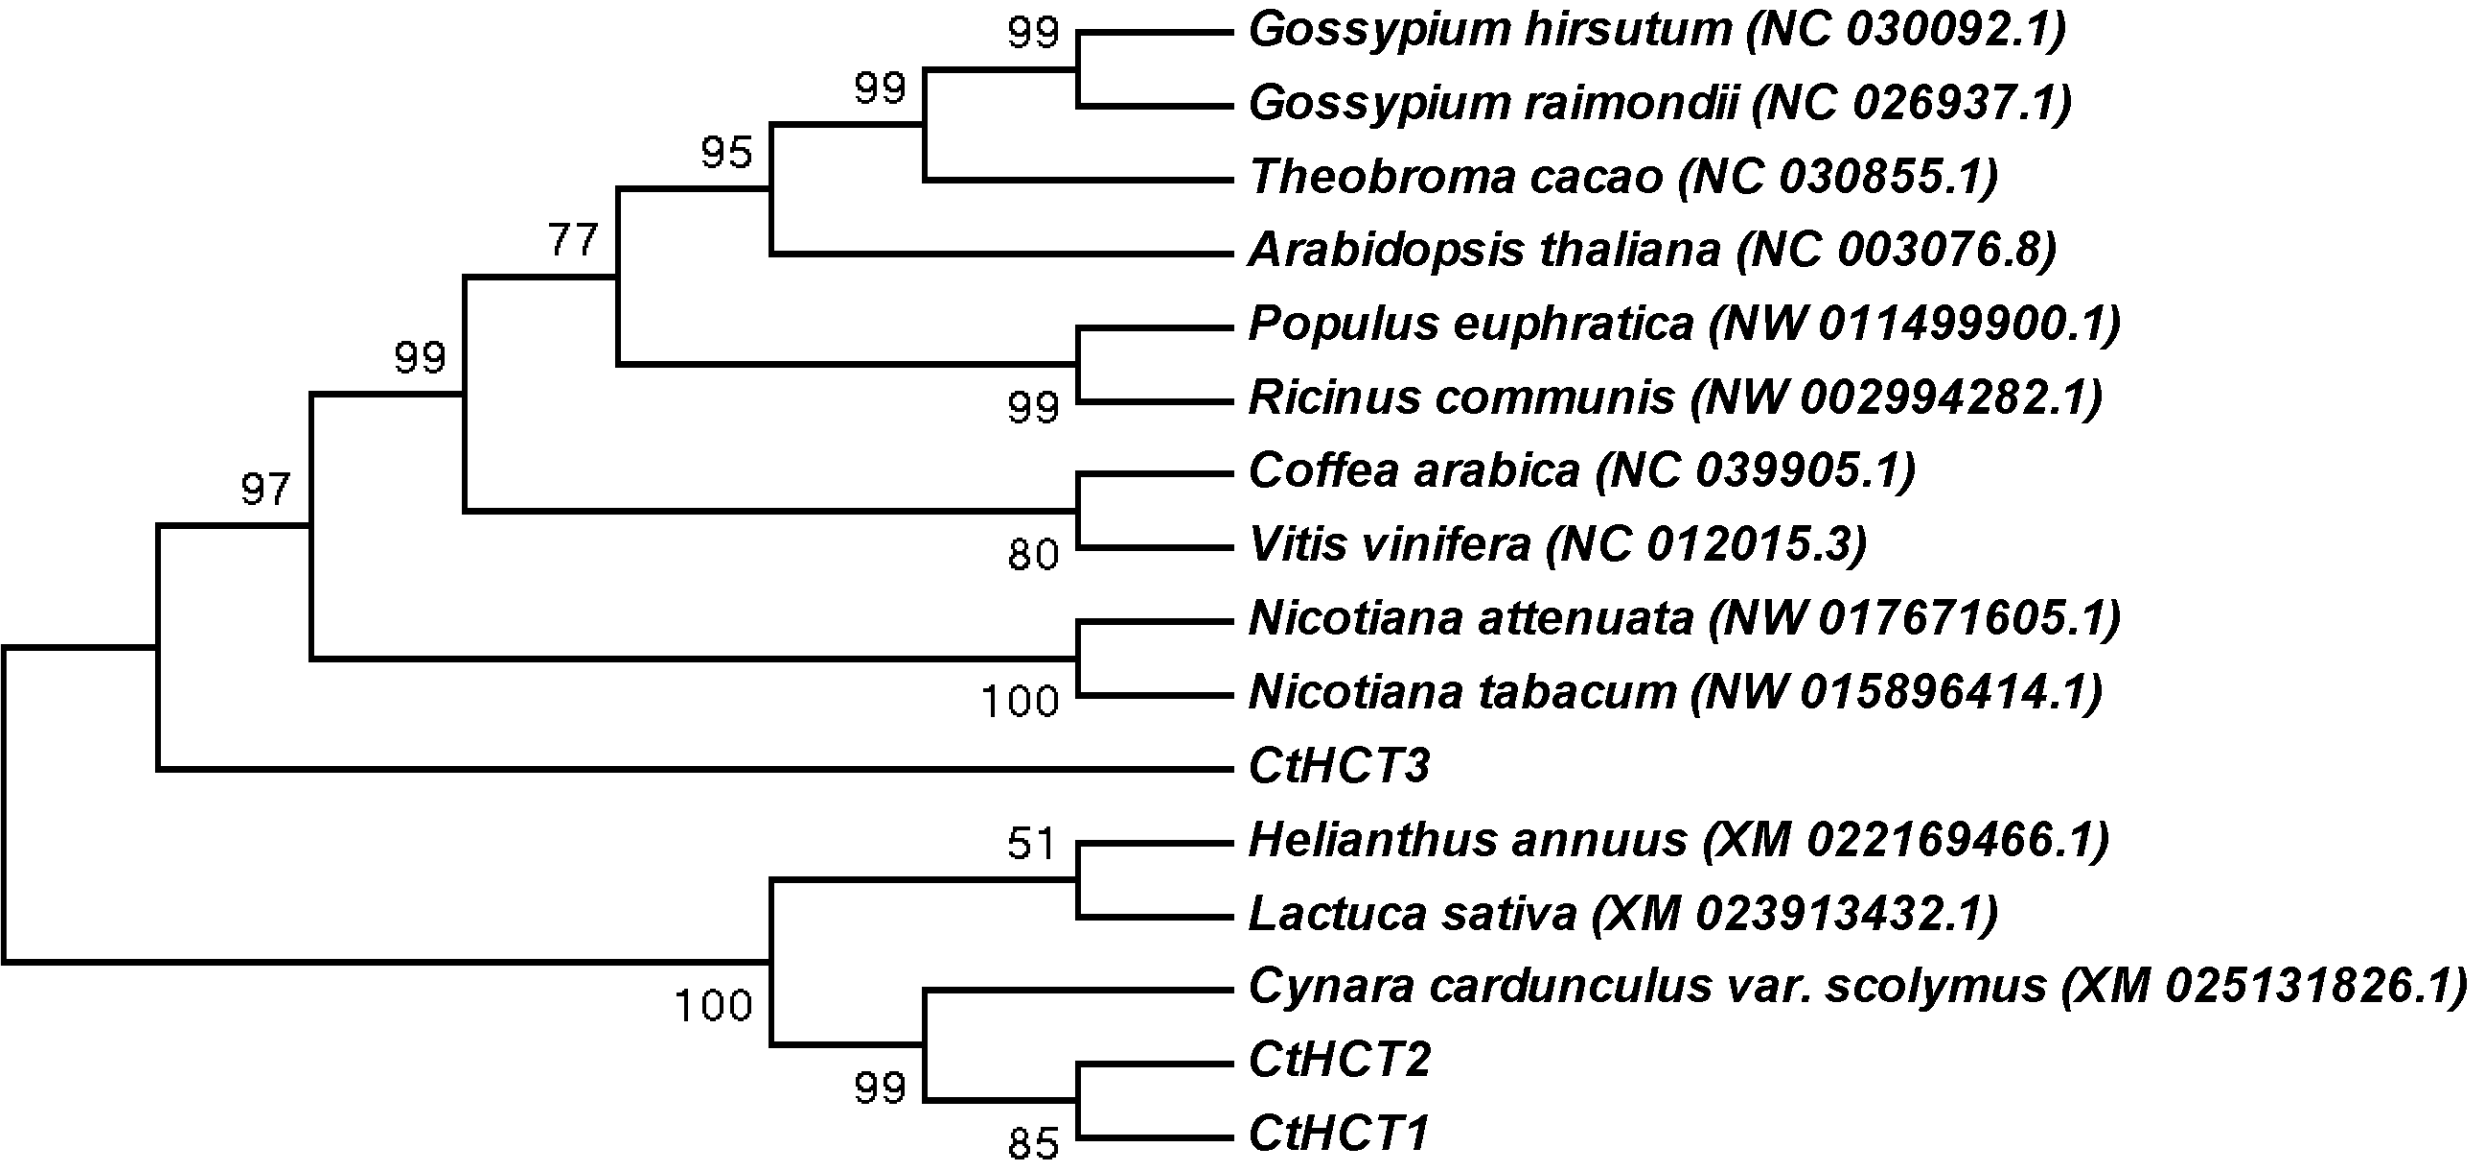

Supplement: Figure_S1.pdf [file Figure_S1.pdf]
